# Supplementary material for: Extracellular vesicles derived from EphB2-overexpressing bone marrow mesenchymal stem cells ameliorate DSS-induced colitis by modulating immune balance
Source: PubMed Central journal article supplement (PMC7962309; doi:10.1186/s13287-021-02232-w), 2021-03-15
Supplement: 13287_2021_2232_MOESM1_ESM.pdf [file 13287_2021_2232_MOESM1_ESM.pdf]

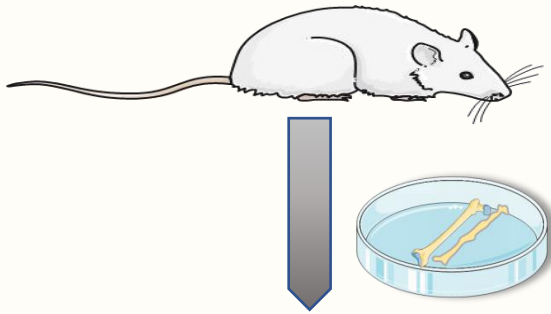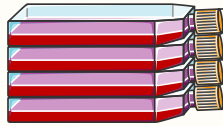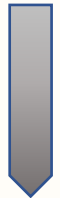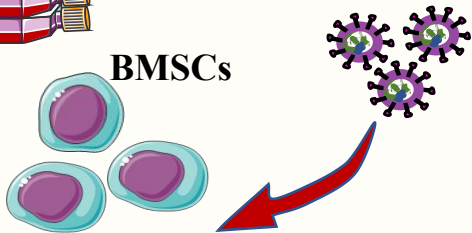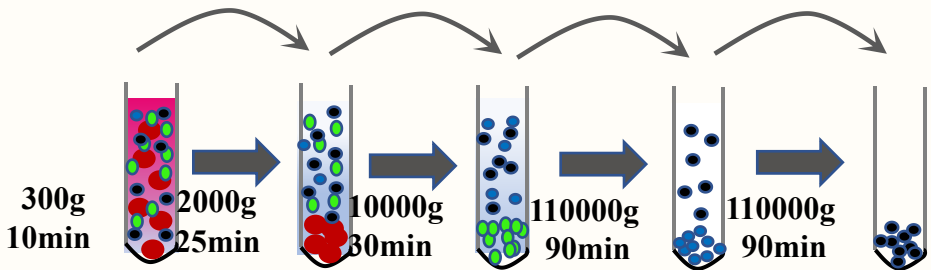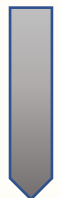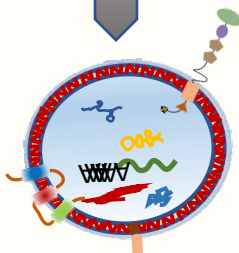

**EphB2-EVs**
