# Supplementary material for: Extracellular vesicles derived from EphB2-overexpressing bone marrow mesenchymal stem cells ameliorate DSS-induced colitis by modulating immune balance
Source: PubMed Central journal article supplement (PMC7962309; doi:10.1186/s13287-021-02232-w), 2021-03-15
Supplement: 13287_2021_2232_MOESM4_ESM.pdf [file 13287_2021_2232_MOESM4_ESM.pdf]

# Ulcerative colitis without treatment

# Ulcerative colitis with EphB2-EVs treatment

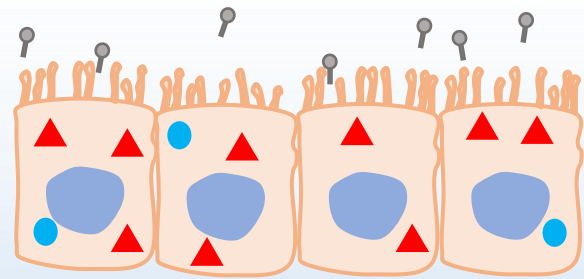

Inflammation and Oxidative stress

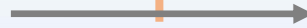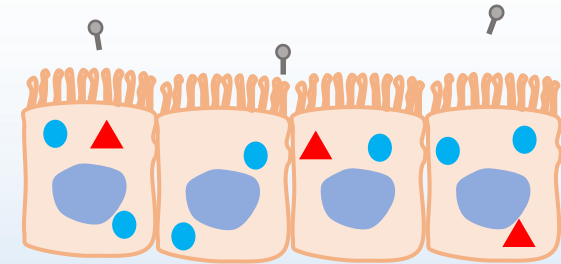

Intestinal epithelial barrier function

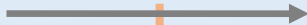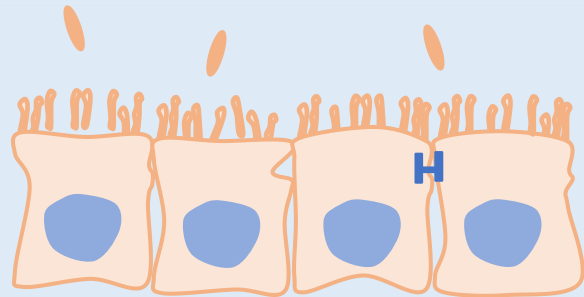

Immune homeostasis

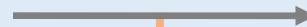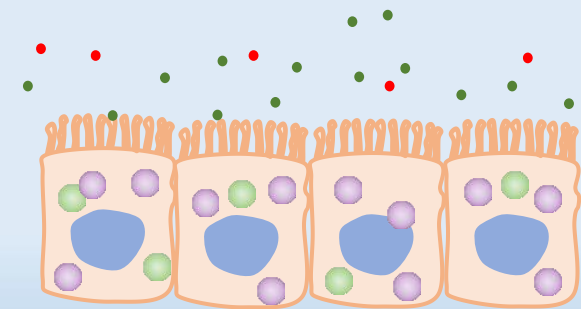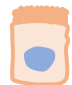

Intestinal epithelial cells

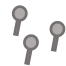

Proinflammatory cytokines

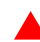

Oxidant

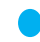

Antioxidant

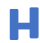

Tight junctions

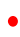

IL-17A

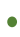

IL-10

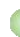

Th17 cell

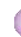

Treg cell
