# Supplementary material for: Extracellular vesicles derived from EphB2-overexpressing bone marrow mesenchymal stem cells ameliorate DSS-induced colitis by modulating immune balance
Source: PubMed Central journal article supplement (PMC7962309; doi:10.1186/s13287-021-02232-w), 2021-03-15
Supplement: 13287_2021_2232_MOESM6_ESM.pdf [file 13287_2021_2232_MOESM6_ESM.pdf]

| <b>Score</b> | <b>Weight loss</b> | <b>Stool consistency</b> | <b>Occult blood</b> |
|--------------|--------------------|--------------------------|---------------------|
| 0            | <1%                | Normal                   | Negative            |
| 1            | 1–5%               | Soft but formed          | Weakly positive     |
| 2            | 5–10%              | Soft                     | Positive            |
| 3            | 10–15%             | Soft and wet             | Strongly positive   |
| 4            | >15%               | Liquid                   | Visible             |

---
