# Supplementary material for: Extracellular vesicles derived from EphB2-overexpressing bone marrow mesenchymal stem cells ameliorate DSS-induced colitis by modulating immune balance
Source: PubMed Central journal article supplement (PMC7962309; doi:10.1186/s13287-021-02232-w), 2021-03-15
Supplement: 13287_2021_2232_MOESM7_ESM.pdf [file 13287_2021_2232_MOESM7_ESM.pdf]

---

| Gene name       |         | Primer sequences (5' to 3') |
|-----------------|---------|-----------------------------|
| EphB2           | Forward | TTATGGCTGTGGCGTTGT          |
|                 | Reverse | CATCACCCCTGTCGTGGTC         |
| ephrin-B1       | Forward | TTACACCACCCACCTCCAC         |
|                 | Reverse | CCTTCCGACTGCCACCT           |
| ROR- $\gamma$ t | Forward | ACCCACACCTCACAAATCG         |
|                 | Reverse | GGAGTAGGCCACATTGCAC         |
| Foxp3           | Forward | AGTACCCCCAAATTCCTGCCT       |
|                 | Reverse | CCACTGTTAGGGTATGGGAGG       |
| $\beta$ -actin  | Forward | CCCGCGAGTACAACCTTCTTG       |
|                 | Reverse | CTGACCCATACCCACCATCAC       |

---
